# Supplementary material for: Genetic drift of human coronavirus OC43 spike gene during adaptive evolution
Source: PubMed Central journal article supplement (PMC4476415; doi:10.1038/srep11451), 2015-06-22
Supplement: srep11451-s1.pdf [file srep11451-s1.pdf]

1 **Genetic drift of human coronavirus OC43 spike gene during**

2 **adaptive evolution**

3 Lili Ren, Yue Zhang, Jianguo Li, Yan Xiao, Jing Zhang, Ying Wang, Lan Chen,

4 Gl ácia Paranhos-Baccal à Jianwei Wang



10 **Figure S2.** The alignment of NTD amino acids sequences of BCoV-Mebus strains  
 11 with representative OC43 strains isolated in different years. The critical sugar-binding  
 12 amino acids in BCoV, 171Y, 191E, 193W and 194H (numbering refer to 87309BE03)  
 13 labeled with asterisk.

|                   |            |               |                    |                     |                     |               |                    |                      |
|-------------------|------------|---------------|--------------------|---------------------|---------------------|---------------|--------------------|----------------------|
|                   | 160        | 170           | 180                | 190                 | 200                 | 210           | 220                |                      |
|                   | .....      | .....         | .....              | .....               | .....               | .....         | .....              |                      |
|                   |            | *             |                    | *                   | **                  |               |                    |                      |
| <b>BCoV-Mebus</b> | <b>D</b>   | <b>--NK</b>   | <b>LQGLLEISVCQ</b> | <b>YTMCEYPHTICH</b> | <b>PNLGNKRVELWH</b> | <b>WDTGVV</b> | <b>SCLYKRNFTYD</b> | <b>VNADYLYFHFYQE</b> |
| <b>ATCC-VR759</b> | <b>.GY</b> | <b>.....V</b> | <b>.....N</b>      | <b>.....Q</b>       | <b>.....H.K</b>     | <b>.....L</b> | <b>.....</b>       | <b>.....</b>         |
| <b>87309BE03</b>  | <b>.GV</b> | <b>.....V</b> | <b>.....N</b>      | <b>.....K</b>       | <b>.....HFK</b>     | <b>.....L</b> | <b>.....</b>       | <b>.....T</b>        |
| <b>HK04-02</b>    | <b>.GV</b> | <b>.....V</b> | <b>.....N</b>      | <b>.....K</b>       | <b>.....HFK</b>     | <b>.....L</b> | <b>.....</b>       | <b>.....T</b>        |
| <b>229/05</b>     | <b>.GV</b> | <b>.....V</b> | <b>.....N</b>      | <b>.....K</b>       | <b>.....HFK</b>     | <b>.....L</b> | <b>.....</b>       | <b>.....T</b>        |
| <b>HK06-01</b>    | <b>.GV</b> | <b>.....V</b> | <b>.....N</b>      | <b>.....K</b>       | <b>.....HFK</b>     | <b>.....L</b> | <b>.....</b>       | <b>.....T</b>        |
| <b>5240/07</b>    | <b>.GV</b> | <b>.....V</b> | <b>.....N</b>      | <b>.....K</b>       | <b>.....HFK</b>     | <b>.....L</b> | <b>.....</b>       | <b>.....T</b>        |
| <b>1034A/08</b>   | <b>.GV</b> | <b>.....V</b> | <b>.....N</b>      | <b>.....K</b>       | <b>.....HFK</b>     | <b>.....S</b> | <b>.....</b>       | <b>.....T</b>        |
| <b>1357A/09</b>   | <b>.GV</b> | <b>.....V</b> | <b>.....N</b>      | <b>.....K</b>       | <b>.....HFK</b>     | <b>.....S</b> | <b>.....</b>       | <b>.....T</b>        |
| <b>HK10-02</b>    | <b>.GV</b> | <b>.....V</b> | <b>.....N</b>      | <b>.....K</b>       | <b>.....HFK</b>     | <b>.....S</b> | <b>.....</b>       | <b>.....T</b>        |
| <b>HK11-01</b>    | <b>.GV</b> | <b>.....V</b> | <b>.....N</b>      | <b>.....</b>        | <b>.....HFK</b>     | <b>.....S</b> | <b>.....</b>       | <b>.....T</b>        |
| <b>12689/12</b>   | <b>.GV</b> | <b>.....V</b> | <b>.....N</b>      | <b>.....</b>        | <b>.....HFK</b>     | <b>.....L</b> | <b>.....</b>       | <b>.....T</b>        |

14  
 15

**Table S1.** Background information for the OC43 S gene sequences

| Strain name           | Accession No.   | Sampling Year | Isolation sites  | Genotype |
|-----------------------|-----------------|---------------|------------------|----------|
| 87309 Belgium<br>2003 | AY903459        | 2003          | Belgium          | B        |
| 19572 Belgium<br>2004 | AY903460        | 2004          | Belgium          | D        |
| HK04-01               | JN129834        | 2004          | Hong Kong, China | C        |
| HK04-02               | JN129835        | 2004          | Hong Kong, China | D        |
| HK04-03               | NA <sup>a</sup> | 2004          | Hong Kong, China | C        |
| HK04-04               | NA              | 2004          | Hong Kong, China | B        |
| HK04-05               | NA              | 2004          | Hong Kong, China | C        |
| HK04-06               | NA              | 2004          | Hong Kong, China | C        |
| HK04-07               | NA              | 2004          | Hong Kong, China | B        |
| HK04-08               | NA              | 2004          | Hong Kong, China | B        |
| HK04-09               | NA              | 2004          | Hong Kong, China | C        |
| HK04-10               | NA              | 2004          | Hong Kong, China | B        |
| HK04-11               | NA              | 2004          | Hong Kong, China | C        |
| HK04-12               | NA              | 2004          | Hong Kong, China | C        |
| HK04-13               | NA              | 2004          | Hong Kong, China | C        |
| HK04-14               | NA              | 2004          | Hong Kong, China | C        |
| HK04-15               | NA              | 2004          | Hong Kong, China | C        |
| HK04-16               | NA              | 2004          | Hong Kong, China | C        |
| HK04-17               | NA              | 2004          | Hong Kong, China | B        |
| HK04-18               | NA              | 2004          | Hong Kong, China | C        |
| HK05-01               | NA              | 2005          | Hong Kong, China | C        |
| HK05-02               | NA              | 2005          | Hong Kong, China | C        |
| 229/05                | KF572816        | 2005          | Beijing, China   | C        |
| 1926/06               | KF572807        | 2006          | Beijing, China   | B        |
| 3582/06               | KF572817        | 2006          | Beijing, China   | C        |
| 3647/06               | KF572818        | 2006          | Beijing, China   | C        |
| HK06-01               | NA              | 2006          | Hong Kong, China | C        |
| 039A/07               | KF572819        | 2007          | Beijing, China   | D        |
| 069A/07               | KF572864        | 2007          | Shandong, China  | D        |
| 079A/07               | KF572820        | 2007          | Beijing, China   | D        |
| 4795/07               | KF572842        | 2007          | Beijing, China   | D        |
| 4954/07               | KF572843        | 2007          | Beijing, China   | D        |
| 5240/07               | KF572844        | 2007          | Beijing, China   | D        |
| 5331/07               | KF572845        | 2007          | Beijing, China   | D        |
| 5345/07               | KF572846        | 2007          | Beijing, China   | D        |
| 5352/07               | KF572847        | 2007          | Beijing, China   | D        |
| 5370/07               | KF572848        | 2007          | Beijing, China   | D        |
| 5414/07               | KF572849        | 2007          | Beijing, China   | D        |
| 5442/07               | KF572850        | 2007          | Beijing, China   | D        |
| 5445/07               | KF572851        | 2007          | Beijing, China   | D        |
| 5472/07               | KF572852        | 2007          | Beijing, China   | D        |
| 5479/07               | KF572853        | 2007          | Beijing, China   | D        |
| 5484/07               | KF572854        | 2007          | Beijing, China   | D        |
| 5485/07               | KF572855        | 2007          | Beijing, China   | D        |
| 5508/07               | KF572856        | 2007          | Beijing, China   | D        |
| 5517/07               | KF572857        | 2007          | Beijing, China   | D        |
| 5519/07               | KF572858        | 2007          | Beijing, China   | D        |
| 5566/07               | KF572859        | 2007          | Beijing, China   | D        |
| 5595/07               | KF572860        | 2007          | Beijing, China   | D        |
| 5617/07               | KF572861        | 2007          | Beijing, China   | D        |

|          |          |      |                  |   |
|----------|----------|------|------------------|---|
| 5625/07  | KF572862 | 2007 | Beijing, China   | D |
| 5656/07  | KF572863 | 2007 | Beijing, China   | D |
| 1034A/08 | KF572824 | 2008 | Beijing, China   | D |
| 1081A/08 | KF572826 | 2008 | Hebei, China     | D |
| 1135A/08 | KF572827 | 2008 | Hebei, China     | D |
| 1157A/08 | KF572828 | 2008 | Guangxi, China   | D |
| 1216A/08 | KF572830 | 2008 | Beijing, China   | D |
| 892A/08  | KF572868 | 2008 | Henan, China     | D |
| 978A/08  | KF572872 | 2008 | Shandong, China  | D |
| HK08-01  | NA       | 2008 | Hong Kong, China | D |
| HK08-02  | NA       | 2008 | Hong Kong, China | D |
| HK09-01  | NA       | 2009 | Hong Kong, China | D |
| HK09-02  | NA       | 2009 | Hong Kong, China | D |
| 8099/09  | KF572865 | 2009 | Beijing, China   | D |
| 8164/09  | KF572866 | 2009 | Beijing, China   | D |
| 8375/09  | KF572867 | 2009 | Beijing, China   | D |
| 9001/09  | KF572870 | 2009 | Beijing, China   | D |
| 9138/09  | KF572871 | 2009 | Beijing, China   | D |
| 1357A/09 | KF572834 | 2009 | Hebei, China     | D |
| 1382A/09 | KF572835 | 2009 | Henan, China     | D |
| 1591A/09 | KF572836 | 2009 | Sichuan, China   | D |
| 1593A/09 | KF572837 | 2009 | Hebei, China     | D |
| 10108/10 | KF572821 | 2010 | Beijing, China   | D |
| 10285/10 | KF572822 | 2010 | Beijing, China   | D |
| 10290/10 | KF572823 | 2010 | Beijing, China   | D |
| 10574/10 | KF572825 | 2010 | Beijing, China   | D |
| 1783A/10 | KF572804 | 2010 | Beijing, China   | E |
| 1908A/10 | KF572805 | 2010 | Beijing, China   | B |
| 1919A/10 | KF572806 | 2010 | Shanxi, China    | B |
| 1997A/10 | KF572808 | 2010 | Neimenggu, China | B |
| 2058A/10 | KF572809 | 2010 | Beijing, China   | E |
| 2134A/10 | KF572838 | 2010 | Beijing, China   | D |
| 2145A/10 | KF572810 | 2010 | Shandong, China  | B |
| 2151A/10 | KF572839 | 2010 | Henan, China     | D |
| HK10-01  | NA       | 2010 | Hong Kong, China | D |
| HK10-02  | NA       | 2010 | Hong Kong, China | D |
| HK11-01  | NA       | 2011 | Hong Kong, China | D |
| HK11-02  | NA       | 2011 | Hong Kong, China | D |
| 2941A/11 | KF572811 | 2011 | Beijing, China   | E |
| 3074A/12 | KF572812 | 2012 | Hebei, China     | E |
| 3184A/12 | KF572813 | 2012 | Beijing, China   | B |
| 3194A/12 | KF572814 | 2012 | Henan, China     | E |
| 3269A/12 | KF572841 | 2012 | Beijing, China   | D |
| 12689/12 | KF572831 | 2012 | Beijing, China   | D |
| 12691/12 | KF572832 | 2012 | Beijing, China   | D |
| 12694/12 | KF572833 | 2012 | Beijing, China   | D |

- 17 <sup>a</sup>NA, not available, sequences were supported from the author published the paper (Lau *et al.*, 2011).
- 18 Lau, S.K. *et al.* Molecular epidemiology of human coronavirus OC43 reveals
- 19 evolution of different genotypes over time and recent emergence of a novel genotype
- 20 due to natural recombination. *J Virol* **85**, 11325-11337 (2011)
